# Supplementary material for: Diagnostic utility of adding needle aspiration (using PeriView FLEX needle) to radial endobronchial ultrasound guide sheath transbronchial lung biopsy: a single center retrospective study
Source: PubMed Central journal article supplement — J Thorac Dis. 2024 Jun 12;16(6):3818–27. doi: 10.21037/jtd-23-1598 (PMC11228739; doi:10.21037/jtd-23-1598), 2024-06-12
Supplement: jtd-16-06-3818-supplementary.pdf [file jtd-16-06-3818-supplementary.pdf]

**Table S1** Diagnosis yields according to each sampling modality

|                                              | All modaliteis<br>(rEBUS GS<br>TBLB/TBNA) | rEBUS GS TBLB  |          |         | rEBUS<br>GS TBLB,<br>overall | rEBUS<br>GS TBNA |
|----------------------------------------------|-------------------------------------------|----------------|----------|---------|------------------------------|------------------|
|                                              |                                           | Biopsy forceps | Brushing | Washing |                              |                  |
| Malignant disease, n                         | 43                                        | 35             | 31       | 15      | 38                           | 33               |
| Adenocarcinoma                               | 28                                        | 25             | 19       | 9       | 26                           | 21               |
| Squamous cell carcinoma                      | 9                                         | 7              | 9        | 3       | 9                            | 7                |
| NSCLC NOS                                    | 2                                         | 0              | 0        | 0       | 0                            | 2                |
| Small cell lung cancer                       | 3                                         | 2              | 2        | 2       | 2                            | 2                |
| Carcinoid                                    | 1                                         | 1              | 1        | 1       | 1                            | 1                |
| Benign disease, n                            | 9                                         | 7              | 2        | 3       | 9                            | 3                |
| Tuberculosis                                 | 5                                         | 3              | 0        | 3       | 5                            | 1                |
| Aspergillosis                                | 2                                         | 2              | 2        | 0       | 2                            | 1                |
| Cryptococcosis                               | 1                                         | 1              | 0        | 0       | 1                            | 0                |
| Organizing pneumonia                         | 1                                         | 1              | 0        | 0       | 1                            | 1                |
| Total number diagnosed, n                    | 52                                        | 42             | 33       | 18      | 47                           | 36               |
| Diagnostic yield (total number diagnosed/74) | 70.3%                                     | 56.8%          | 44.6%    | 24.3%   | 63.5%                        | 48.6%            |

GS, guide sheath; NSCLC NOS, non-small cell lung cancer not otherwise specified; rEBUS, radial endobronchial ultrasound; TBLB, transbronchial lung biopsy; TBNA, transbronchial needle aspiration.
